# 1 Dynactin p150 promotes processive motility of DDB complexes by 2 minimizing diffusional behavior of dynein

3

4 Running title: Diffusional switching of dynein

5

6 Qingzhou Feng<sup>1,2</sup>, Allison M. Gicking<sup>1</sup> and William O. Hancock<sup>1,2,\*</sup>

7 <sup>1</sup> Department of Biomedical Engineering, Pennsylvania State University, University Park,  
8 Pennsylvania

9 <sup>2</sup> Molecular Cellular and Integrative Biological Sciences Program, Huck Institute of Life Sciences,  
10 Pennsylvania State University, University Park, Pennsylvania

11 Correspondence:

12 William O. Hancock  
13 430 Chemical and Biomedical Engineering Building  
14 Pennsylvania State University  
15 University Park, PA 16802.  
16 Email: wohbio@engr.psu.edu  
17

18

19

## 19 Abstract

20

21 Cytoplasmic dynein is activated by forming a complex with dynactin and the adaptor  
22 protein BicD2. We used Interferometric Scattering (iSCAT) microscopy to track dynein-  
23 dynactin-BicD2 (DDB) complexes *in vitro* and developed a regression-based algorithm  
24 to classify switching between processive, diffusive and stuck motility states. We find that  
25 DDB spends 65% of its time undergoing processive stepping, 4% undergoing 1D  
26 diffusion, and the remaining time transiently stuck to the microtubule. Although the p150  
27 subunit was previously shown to enable dynactin diffusion along microtubules, blocking  
28 p150 enhanced the proportion of time DDB diffused and reduced the time DDB  
29 processively walked. Thus, DDB diffusive behavior most likely results from dynein  
30 switching into an inactive (diffusive) state, rather than p150 tethering the complex to the  
31 microtubule. DDB - kinesin-1 complexes, formed using a DNA adapter, moved slowly  
32 and persistently, and blocking p150 led to a 70 nm/s plus-end shift in the average  
33 velocity, in quantitative agreement with the increase in diffusivity seen in isolated DDB.  
34 The data suggest a DDB activation model in which engagement of dynactin p150 with  
35 the microtubule promotes dynein processivity, serves as an allosteric activator of  
36 dynein, and enhances processive minus-end motility during intracellular bidirectional  
37 transport.

38

## 39 TOC Highlight:

40 Dynein-dynactin-BicD2 (DDB) is highly processive, but also shows transient pausing  
41 and diffusion, which we analyzed using iSCAT microscopy. Blocking dynactin p150  
42 results in more diffusion of isolated DDB and a plus-end shift of kinesin-1 – DDB

43 complexes. Thus, we conclude that p150 is an allosteric activator of dynein in the DDB  
44 complex.  
45

## 46 Introduction:

47  
48 Intracellular transport is carried out by kinesin and cytoplasmic dynein motors that walk  
49 in opposite directions along microtubules, allowing for efficient bidirectional movement  
50 of cargo<sup>1-3</sup>. Most cellular cargos have both kinesin motors and dynein motors bound to  
51 them<sup>4,5</sup>, suggesting that robust coordination between, and regulation of, the opposite-  
52 polarity motors is required for transport; however, the underlying mechanisms are not  
53 clear. The currently prevailing model is the tug-of-war<sup>5,6</sup>, in which ensembles of  
54 oppositely-directed kinesins and dyneins compete, and the stronger motor team  
55 determines the directionality. However, a number of studies have found that inhibition  
56 of one type of motor diminishes transport in both directions<sup>7-10</sup>; a result that suggests  
57 codependence of kinesin and dynein, and which contradicts the tug-of-war model. The  
58 tug-of-war model also does not properly account for the growing evidence that motor  
59 activity can be regulated via binding partners, and post-translational modifications of the  
60 microtubule tracks<sup>11,12</sup>. A more complete picture of intracellular transport must include  
61 the mechanisms by which kinesin and dynein coordinate their antagonistic activities.  
62 However, understanding this coordination first requires a more precise characterization  
63 of the individual motors, and how their activities are regulated.

64  
65 Due to its diverse cellular functions, cytoplasmic dynein is known to be regulated  
66 through binding to a wide array of cargo adapter proteins<sup>13</sup>, a confounding factor in the  
67 effort to understand its motility. In contrast to its counterpart in yeast, it was recently  
68 discovered that mammalian dynein requires activating adapter proteins to achieve  
69 robust motility and substantial force generation *in vitro*<sup>14,15</sup>. Isolated dynein adopts an  
70 inhibited phi state in which one motor domain is rotated 180 degrees with respect to the  
71 other and the two microtubule binding domain stalks are crossed, preventing  
72 microtubule binding and motility<sup>16</sup>. Structural studies show that, when bound to its  
73 cofactor dynactin and the cargo adaptor BicD2, the dynein motor domains are released  
74 from the phi state and exist in an “open” conformation where they are either in a  
75 “parallel” arrangement optimal for processive walking, or in an “inverted” arrangement  
76 that allows microtubule binding but poor motility<sup>16</sup>. BicD2 is a coiled-coil homodimer that  
77 strengthens the normally weak interaction between the dynein tail and the dynactin  
78 filament, constraining the orientation of the dynein heads, and most likely stabilizing the  
79 parallel conformation<sup>17-19</sup>. This idea is supported by single molecule assays, where  
80 DDB complexes shows robust landing activity, superprocessivity, and considerably  
81 higher stall forces than dynein-dynactin or dynein alone<sup>12,20,21</sup>. However, a molecular  
82 description of how BicD and related adapters such as BicDR, Hook3 and Spindly work  
83 together with dynactin to activate dynein is still being resolved<sup>12,20,22</sup>.

84  
85 A notable characteristic of activated dynein complexes *in vitro* is the broad distribution  
86 of measured velocities<sup>23,24</sup>. As less than half of DDB complexes were observed to be in  
87 the activated open parallel conformation by CryoEM<sup>16</sup>, one explanation for this  
88 heterogeneity is that the motors switch between active and inactive states on a  
89 timescale faster than the experimental time resolution. This switching could produce  
90 periods of processive stepping interspersed with periods of pausing or 1D diffusion with  
91 zero net speed; thus, the overall speed would reflect the fraction of time the motor

92 spends in an activated state. But what could cause this switch? One candidate is the  
93 dynactin p150 subunit, which contains a flexible linker terminating in a positively-  
94 charged CAP-Gly domain that can interact with the microtubule and is known to affect  
95 dynein motility<sup>25</sup>. However, the mechanism underlying this dynein velocity heterogeneity  
96 has never been investigated due to a lack of high-resolution motility data and  
97 appropriate analysis tools to objectively separate the different motility states.

98  
99 Here, we apply high-resolution particle tracking and a novel switch point detection  
100 algorithm to investigate the mechanism of dynein activation by BicD2 and dynactin.  
101 Consistent with previous observations<sup>12,19,20,26</sup>, DDB transitions between processive,  
102 diffusive, and stuck states. The stuck and diffusive episodes could be entirely due to  
103 p150-microtubule interactions; alternatively, they could reflect dynein being in an  
104 inhibited state that retains microtubule binding. We explored these two possibilities  
105 using a p150 antibody, previously shown to inhibit p150 interaction with  
106 microtubules<sup>25,27-29</sup>. We found that blocking p150 led to longer and more frequent  
107 diffusive episodes and shorter processive episodes, suggesting that the diffusive  
108 behavior of DDB results from the dynein heads rather than from p150. When DDB was  
109 complexed with kinesin-1 using a DNA adapter, blocking p150 led to a plus-ended shift  
110 in the mean velocities, in quantitative agreement with the switching behavior of DDB  
111 alone. Thus, we conclude that dynactin subunit p150 acts as an allosteric activator of  
112 dynein that accelerates switching from, and helps prevent a return to, its inhibited state.

113  
114 **Methods:**

### 115 116 **1. Plasmid constructs and DDB purification**

117 BicD2 (25-400 a.a.)<sup>20</sup> was inserted to the pET28a plasmid with an N-term StrepII tag  
118 and a C-term eGFP and His6 tag, expressed in *E. coli*, and purified by Ni column  
119 chromatography. Bovine brains were sliced and flash-frozen on dry ice at the  
120 slaughterhouse, and stored at -80 °C. To purify DDB, brain was mixed with equal  
121 volume of 50H50P buffer (50 mM Hepes, 50 mM Pipes, 2 mM MgSO<sub>4</sub>, 1 mM EDTA, pH  
122 7.0), incubated in 37 °C water bath, and then homogenized in a blender, following  
123 published protocols<sup>20</sup>. The lysate was clarified by centrifugation at 30,000 x g for 30  
124 min, and the supe was mixed with equal volume A buffer (30 mM Hepes, 1 mM EGTA,  
125 50 mM K-acetate, 2 mM Mg-acetate, 10% glycerol, pH 7.4) supplemented with 3 mM  
126 DTT, 1 mM PMSF and 0.1% NP-40 alternative<sup>20</sup>. The mixture was further centrifuged at  
127 100,000 x g for 20 min, and the supe mixed with 100 nM BicD2 and incubated at 4°C for  
128 2 hr. A column containing 2 ml of StrepTactin beads (IBA, Lifesciences) was rinsed with  
129 3 column volumes of A buffer, the sample was applied to the column, the column was  
130 washed with A buffer, and the protein was eluted with A buffer containing 3 mM DTT  
131 and 5 mM d-Desthiobiotin (Sigma-Aldrich). The elution was used directly in single  
132 molecule experiments or flash frozen on liquid N<sub>2</sub> and stored at -80 °C.

### 133 134 **2. Nanoparticle functionalization of DDB**

135 DDB containing a C-terminal GFP was attached to streptavidin-functionalized  
136 nanoparticles through a biotinylated GFP binding protein nanobody (GBP)<sup>30,31</sup>.  
137 Following a previous approach<sup>32</sup>, a coexpression plasmid containing the BirA enzyme

138 was constructed by inserting the GBP<sup>31</sup> sequence followed by a C-terminal Avi-tag  
139 (GLNDIFEAQKIEWH)<sup>32</sup> and His<sub>6</sub> tag. Biotinylated GBP was bacterially expressed and  
140 purified by Ni column chromatography. In all experiments, cover slips were washed  
141 thrice each with 70% ethanol and ddH<sub>2</sub>O. Microtubules were bound to the coverglass of  
142 flow cells using full-length rigor kinesin-1<sup>32</sup>. For landing experiments, DDB complexes  
143 were first mixed 1:1 with GBP and incubate for 5 min and then diluted to 10 nM with  
144 motility buffer, mixed with 10 nM quantum dots (incubate for 5 min), and added to the  
145 flow cell in the presence of 1 mM ATP. In Apo-lock experiments, 10 nM DDB complexes  
146 (based on GFP fluorescence) were first added to the flow cell in the absence of ATP  
147 and incubate for 5 mins to allow binding to the microtubules. After a wash to remove  
148 unbound complexes, a 10 nM solution of GBP was injected and incubated for 5 min to  
149 allow binding to BicD-GFP. Next, 10 nM streptavidin-coated quantum dots (655 nm  
150 emission; Life Technologies) were injected into the flow cell and allowed 5 min to bind to  
151 the biotinylated GBP. Finally, motility buffer containing 1 mM ATP was injected to initiate  
152 motility, and the flow cell transferred to the microscope.

153

### 154 **3. Fluorescence microscopy and particle tracking**

155 Single molecule quantum dot experiments were carried out by TIRF microscopy, as  
156 previously described<sup>31</sup>. 500-frame movies were taken at 20 frames/s, starting 5 mins  
157 after injecting the final motility solution, and at least 5 independent flow cells were  
158 studied for each measurement. For each field, an image was taken of the Cy5-labeled  
159 microtubules. For Ab<sub>p150</sub> experiments, DDB was mixed with 25 ug/ml Ab<sub>p150</sub> (BD,  
160 Biosciences, No. 610474), incubated for 30 min on ice<sup>33</sup>, and all subsequent solutions  
161 introduced into the flow cell also contained 25 ug/ml Ab<sub>p150</sub>. Image processing and  
162 kymograph analysis were performed in Image J (National Institutes of Health, Bethesda,  
163 MD). Landing rates were calculated by counting all events on a given microtubule for 10  
164 seconds video length, and normalizing to counts to per min per microtubule length.  
165 Minimum event duration was 200 ms.

166

### 167 **4. iSCAT microscopy and image processing**

168 Flow cells for iSCAT microscopy were prepared similarly to TIRFM, with minor  
169 modifications. After Apo-lock of DDB to microtubules, 1 nM GBP was introduced and  
170 incubated for 5 min, followed by introduction of 1 nM of 30 nm gold nanoparticles (BBI  
171 Solutions) and a 5 min incubation to allow binding. Finally, ATP motility buffer was  
172 introduced and incubated for 5 min to initiate movement, the flow cell was then  
173 transferred to the microscope. The iSCAT microscope used in the work was described  
174 previously<sup>34</sup>. Images were taken using custom written LabVIEW software. The videos  
175 were taken at 100 fps for 1000 frames with an effective pixel size of 32 nm. Even  
176 illumination was achieved through flat fielding before image acquisition<sup>32</sup>. A background  
177 image of stationary microtubules before or after particle binding was subtracted from the  
178 stack of iSCAT images, and the resulting movies were then inverted to obtain a bright  
179 gold signal on a dark background. Particle positions over time were tracked by  
180 FIESTA<sup>35</sup>; if no particle position was determined for 10 consecutive frames due to low  
181 signal/noise, the trace was terminated. Details for the switch detection algorithm are  
182 provided in Supplementary Information.

183

## 184 **5. Kinesin-1/DDB origami experiments**

185 DDB and *Drosophila* kinesin-1 motors (truncated at residue 560 and C-terminal GFP  
186 tagged<sup>36</sup>) were linked to a dsDNA scaffold following a previously published protocol  
187 employing GBP functionalized with specific DNA<sup>31</sup>. To generate motors functionalized  
188 with different oligonucleotides, DDB was incubated for 15 min on ice with GBP1 in  
189 excess, and kinesin incubated with GBP2 in excess. Next, DDB-GBP1 was incubated  
190 for 15 min on ice with an excess concentration of DNA scaffold containing single-  
191 stranded overhangs on both ends and biotin on one end (**Fig. 8A**; scaffold described  
192 previously<sup>31</sup>). The mixture was then introduced into a flow cell containing surface-  
193 immobilized microtubules, and incubated for 5 min in the absence of ATP to allow  
194 binding of the DDB-GBP1-DNA complexes to the microtubules. The flow cell was then  
195 washed twice with A buffer containing 0.2 mg/ml casein and 10  $\mu$ M Taxol to remove any  
196 unbound motors, BicD2, and GBP1, leaving only DDB with attached DNA scaffolds  
197 bound to the microtubules. An excess of kinesin-1 - GBP2 was then introduced into the  
198 flow cell and incubated for 5 min to populate the second end of the DNA scaffolds with  
199 kinesin motors. 1 nM quantum dots (633 nm emission) were then introduced into to the  
200 flow cell in the presence of ATP to label the DNA scaffolds and initiate movement, and  
201 videos were taken immediately. To determine microtubule polarity, we observed the  
202 plus-end streaming of the free GFP-labeled kinesin-1 motors in the GFP channel (**Fig.**  
203 **8B, Supplementary Video 1**).

204

### 205 **Results:**

206

#### 207 **Purified DDB complexes display diverse motility behavior**

208

209 DDB complexes were purified from bovine brain lysate by adding recombinant BicD2,  
210 binding the complexes to StrepTactin beads (IBA Lifesciences), and eluting from the  
211 beads with d-Desthiobiotin (Sigma-Aldrich)<sup>37</sup> (**Fig. 1A, B**). The purified DDB contained  
212 a C-terminal GFP on BicD2 for visualization, but for enhanced spatiotemporal  
213 resolution, we attached streptavidin-functionalized quantum dots (Qdots) through a  
214 biotinylated GFP binding protein (GBP) nanobody<sup>30</sup> (**Fig. 1C**; see Methods for details).  
215 Using total internal reflection fluorescence (TIRF) microscopy with 50 ms exposure time,  
216 we tracked the motility of single DDB complexes along surface-immobilized  
217 microtubules and compared them to kinesin-1. Whereas kinesin-1 displayed runs with  
218 uninterrupted motility, DDB displayed three different motility behaviors: processive runs,  
219 diffusional episodes and stuck segments where no movements were detected (**Fig. 1D**).  
220 These behaviors have been observed in published DDB traces, but studies to date have  
221 generally focused only on segments of processive motility<sup>12,20</sup>.

222

#### 223 **Blocking dynactin p150 alters DDB landing and motility**

224

225 The role of the dynactin p150 subunit in dynein activation has not been investigated,  
226 although p150 has been shown to act as both a tether and a brake in dynein-dynactin  
227 complexes<sup>25</sup>. To characterize how dynactin p150 alters DDB function, we utilized a  
228 p150 antibody (Ab<sub>p150</sub>) that has previously been shown to block the interaction of p150  
229 with microtubules<sup>25,27,28,33</sup>, and compared the DDB motility in the absence and presence  
of Ab<sub>p150</sub>. We first asked what role p150 plays in the initial landing of DDB to the



230 microtubule. Based on its tethering activity, it could enhance landing by making first  
231 contact with the microtubule and allowing the dynein heads to bind; alternatively, the  
232 runs could be all initiated by dynein heads binding (**Fig. 2A**). In the presence of  
233 antibody, the DDB landing frequency decreased by roughly three-fold compared to  
234 control (**Fig. 2B, C**). This result, consistent with previous observations<sup>25,38</sup>, suggests  
235 that the initial encounter of DDB with the microtubule usually occurs through p150,  
236 although more complex mechanisms are possible. Because our DDB preparation  
237 contained a sub-fraction of p135 (**Fig 1B**), an isoform that lacks the CAP-Gly domain, it  
238 is possible that a fraction of the remaining landing events in the presence of p150  
239 antibody represent complexes containing p135 rather than p150, meaning that our  
240 measurements provide a lower bound of the antibody effect.

241  
242 We next asked how, following initial landing of DDB on the microtubule, p150 influences  
243 dynein motility. To analyze dynein motility, the observed landing events were separated  
244 into three classes: stuck (S) complexes moved less than 100 nm overall; diffusive (D)  
245 complexes moved bidirectionally more than 100 nm for both directions with no observed  
246 unidirectional processive segments longer than 350 nm; and processive (P) complexes  
247 contained at least one segment of unidirectional movement longer than 350 nm (**Fig.**  
248 **2D**). For control DDB, roughly half of the complexes that landed displayed processive  
249 motility, and the rest were split between diffusive and stuck (**Fig 2E**). Blocking dynactin  
250 p150 with the antibody reduced the frequency of processive molecules by half, and  
251 reduced the number of diffusional and stuck complexes to near zero (**Fig. 2E**). A simple  
252 interpretation of the drop in processive events is that half of these events occur when  
253 dynein initially contacts the microtubule and the other half when dynactin p150 initially  
254 contacts the microtubule. It follows that molecules that solely diffuse along or stick to the  
255 microtubule without any processive behavior initially bind to the microtubule through  
256 their dynactin p150 subunit, and their dynein is either in an inhibited state or possibly  
257 damaged.

### 258 259 **Dynactin p150 enhances processive and diminishes diffusive behavior of DDB**

260  
261 To select for active DDB complexes, we introduced DDB into the chamber in the  
262 absence of ATP, such that active dynein bound to the immobilized microtubules in the  
263 apo (no nucleotide) state. Following this “Apo-lock”, any unbound complexes were  
264 washed out with nucleotide-free buffer, and movement was initiated by flowing ATP  
265 containing buffer into the chamber (**Fig. 3A**). Here “active DDB complexes” are defined  
266 as those that bind microtubules statically in the apo state and release in the ATP state.  
267 As with the landing experiments, processive, diffusive, and stuck behaviors were all  
268 observed (**Fig. 3B**). In the absence of dynactin p150 antibody, roughly half of the  
269 complexes moved processively upon ATP addition, whereas the other half either  
270 remained stuck in ATP (~40%) or displayed only diffusive behavior (~10%) (**Fig 3C;**  
271 **DDB**). In the presence of dynactin p150 antibody, the fraction of processive complexes  
272 fell, while the fraction of diffusive complexes increased (**Fig 3C; p150**). This is the  
273 opposite of what would be predicted if p150 were simply acting as a diffusional tether; if  
274 that were the case, there should be fewer diffusive complexes when p150 is blocked.  
275 Although informative, this analysis categorized every particle as processive, diffusive, or

276 stuck, which is relatively coarse. Deeper understanding of how dynein is activated in the  
277 DDB complex and how dynactin p150 contributes to this activation requires a more  
278 detailed analysis of the processive complexes, where DDB switches between  
279 processive, diffusive and stuck states within a single run.

### 280 281 **p150 promotes switching into and prevents switching out of the processive state**

282  
283 To investigate how p150 affects the kinetics of DDB switching between different motility  
284 states, we enhanced our temporal resolution by attaching 30 nm gold nanoparticles to  
285 BicD2 in our DDB complex and tracking them with Interferometric Scattering (iSCAT)  
286 microscopy. An iSCAT image is formed by interference between light scattered by the  
287 gold particle and light reflected at the glass-water interface of the sample (**Fig. 4A**)<sup>39</sup>.  
288 With this approach, unlabeled microtubules and gold particles can be visualized  
289 simultaneously, with particles appearing as dark spots on a bright background (**Fig. 4B**).  
290 After subtracting an image of the stationary microtubule and inverting the image to  
291 produce a bright particle on a dark background, the point-spread function (PSF) of the  
292 gold particle can be fit by a 2-D Gaussian distribution (**Fig. 4D**) to achieve nm-scale  
293 spatial precision. By analyzing movies with FIESTA software<sup>35</sup>, x-y position over time  
294 data was collected at 100 frames/s, which we found to be the optimal temporal  
295 resolution for this work.

296  
297 By processing the traces to obtain linear distance along the microtubule over time, DDB  
298 complexes clearly switch between processive, diffusive and stuck states during a given  
299 trace (**Fig. 4E**). Although some phases such as long processive or stuck phases are  
300 readily identifiable, diffusive phases are particularly difficult to define, despite the high  
301 spatiotemporal resolution. Thus, we developed an objective algorithm for classifying  
302 processive, diffusive and stuck durations within a single trace. The algorithm, described  
303 fully in Supplementary Methods, uses a 10-frame running window and calculates the  
304 positional standard deviation, the slope, and the residual around the slope for each  
305 point in the trace. Based on defined cutoff values that are optimized with simulations,  
306 each point is classified and the traces are then broken into continuous segments of at  
307 least 100 msec (10 frame) duration each. A gallery of processed traces is shown in **Fig.**  
308 **5**, with colors indicating processive (red), diffusive (blue), and stuck (black) states.

309  
310 Dividing each single molecule trajectory into different phases, or motility states, provides  
311 distributions of time the motor spends in each state, as well as the switching rates  
312 between the three states. For DDB under control conditions, processive segments had  
313 the longest duration at 0.81 s, followed by stuck (0.53 s) and diffusive (0.23 s) phases  
314 (**Fig. 6 A**). The most frequent switching was between stuck and processive states (**Fig.**  
315 **6 A inset**), meaning that there were relatively frequent short pauses during processive  
316 stepping. The second most common switching was between processive and diffusive  
317 states. These two behaviors can be seen qualitatively in **Fig. 5** as short black and blue  
318 phases interspersed in the relatively long processive runs in red.

319  
320 From the state durations and switching frequencies, we created a kinetic model for how  
321 DDB switches between processive, diffusive and stuck states and what fraction of the



322 time the motors spend in each state. Each state (P, D and S) has two transitions in and  
323 two transitions out, and all transitions were assumed to be first order based on the  
324 roughly exponential distribution profiles in **Fig. 6A**. The transition rate out of any given  
325 state equals the sum of the two rate constants exiting that state, and the relative rates  
326 between the two exit paths are taken from the measured switch rates in **Fig. 6A inset**.  
327 The switching model (**Fig. 6C**) provides a wealth of information. First, the motors spend  
328 65% of the time in the processive state and most of the remaining time (31%) in the  
329 stuck (paused) state. Second, if the motors ever enter the diffusive state or the stuck  
330 state, they rapidly transition back to the processive state (at  $3.9 \text{ s}^{-1}$  and  $1.8 \text{ s}^{-1}$ ,  
331 respectively). Finally, transient events that break up the processive runs are more often  
332 short pauses (occurring at a frequency of  $1 \text{ s}^{-1}$ ), rather than diffusive episodes (at a  
333 frequency of  $0.23 \text{ s}^{-1}$ ).

334  
335 To understand the role of dynactin p150 in dynein activation and diffusional tethering,  
336 we repeated the analysis for DDB in the presence of the p150 antibody. When dynactin  
337 p150 was blocked, the duration of the processive segments decreased to 0.61 s, while  
338 the duration of diffusional segments increased to 0.37 s (**Fig. 6B**). Compared to control,  
339 switching occurred less frequently between processive and stuck states, and more  
340 frequently between processive and diffusive states (**Fig. 6B inset**). As clearly shown in  
341 the kinetic model (**Fig. 6D**), blocking p150 caused the motor to spend less time in the  
342 processive state (55%) and more time in the diffusive state (16 %). The kinetic  
343 explanation for this (highlighted by red and blue arrows in **Fig. 6 C and D**) is that the  
344 presence of p150 causes DDB to switch 69% *more* frequently from the diffusive state  
345 into the processive state and to switch 73% *less* frequently out of the processive state  
346 back to the diffusive state. A structural interpretation of these results is shown in **Fig. S7**  
347 and discussed more fully below. To conclude, allowing p150 to interact with the  
348 microtubule both promotes and stabilizes the processive state of dynein in the DDB  
349 complex.

350

### 351 **p150 enhances minus-end directionality of kinesin-DDB complexes**

352

353 Based on the finding that p150 enhances the time DDB spends in the processive state,  
354 it follows that p150 should enhance dynein's ability to compete against kinesin-1 in a  
355 tug-of-war such as occurs during intracellular bidirectional transport. To investigate this  
356 possibility, we reconstituted the kinesin-dynein bidirectional transport system *in vitro*  
357 using a DNA origami scaffold. One kinesin-1 motor and one DDB were connected  
358 through a DNA scaffold functionalized with a quantum dot (**Fig. 8A**), and the complexes  
359 tracked by TIRF microscopy. Consistent with previous *in vitro* tug-of-war experiments<sup>12</sup>,  
360 long duration events were observed with mean velocities much slower than either  
361 individual unloaded motor speed, indicating that both motors engaged with the  
362 microtubule (**Fig. 8B**). To investigate the role of p150 in bidirectional transport, we  
363 compared the mean velocities of traces in the absence and presence of Ab<sub>p150</sub>. The  
364 simple prediction is that, if blocking p150 increases the fraction of time the motor is in  
365 the diffusive state (from 4% to 16%; **Fig 6C, D**) then the mean velocity should shift  
366 toward the plus-end in the presence of the antibody. For the control case, we measured  
367 a mean velocity of  $-9.1 \pm 9.2 \text{ nm/s}$  (mean  $\pm$  SEM, N = 33) toward the minus-end (**Fig.**

368 **8D**). In the presence of Ab<sub>p150</sub>, the mean velocity shifted to  $62 \pm 17$  nm/s (mean  $\pm$  SEM,  
369  $N = 32$ ; **Fig. 8D**), a statistically significant change ( $p = 0.0004$  by two-tailed t-test). In  
370 addition, the proportion of complexes with a net plus-end directionality increased from  
371 42% in the control case to 75% when p150 was blocked (**Fig. 8E**).

372  
373 The  $+71 \pm 19$  nm/s shift in the mean velocity when p150 was blocked is in good  
374 quantitative agreement with our switching model, as follows. The diffusive episodes  
375 analyzed to develop the detection algorithm had a 1D diffusion constant of  $D = 20,000$   
376  $\text{nm}^2/\text{s}$  by mean-squared displacement analysis (Fig S1D). This can be converted to a  
377 drag coefficient,  $\gamma$ , using  $D = k_B T / \gamma$ , where Boltzman's constant times absolute  
378 temperature,  $k_B T = 4.1$  pN-nm<sup>40</sup>. The resulting drag coefficient of  $\gamma = 0.0002$  pN-s/nm  
379 means that a DDB in the diffusive state that is being pulled by a kinesin moving at  $v =$   
380  $500$  nm/s should produce a drag force ( $F = \gamma * v$ ) of only 0.1 pN, which should not slow  
381 the kinesin<sup>41</sup>. From the switching model in **Fig. 6C, D**, blocking p150 increased the  
382 fraction of time in the diffusive state by 12%, from 4% to 16%. If the complexes move at  
383  $500$  nm/s for 12% of the time, this would contribute  $0.12 * 500$  nm/s = 60 nm/s of mean  
384 plus-end velocity, which closely matches the observed  $+71 \pm 19$  nm/s increase. Thus,  
385 we interpret the slow kinesin-DDB transport velocities to reflect the antagonistic motors  
386 pulling against one another with DDB stochastically switching between motile states.  
387 Blocking p150 shifts DDB toward more time in the diffusive state that kinesin readily  
388 pulls against, resulting in a plus-end shift in the net transport velocity.

389  
390

## 391 **Discussion:**

392  
393 Understanding how specific intracellular cargo are targeted to their proper cellular  
394 locations requires understanding how bidirectional transport is regulated, which in turn  
395 requires understanding the regulation of dynein activation. By tracking DDB complexes  
396 at high temporal resolution and applying our change-point detection algorithm, we found  
397 that in the DDB complex, dynein switches between active and inactive states at rates  
398 exceeding  $1 \text{ s}^{-1}$  (**Fig. 6C**). This analysis leads to two questions. First, to what degree is  
399 dynactin p150 tethering the complex during processive motility? Second, do the  
400 diffusive and stuck periods reflect only p150 interacting with the microtubule, only  
401 inhibited dynein interacting with the microtubule, or some combination of the two?  
402 Blocking p150 provides the following insights. First, the observation that blocking p150  
403 results in more, rather than fewer diffusive complexes (**Fig. 3C**) suggests that diffusive  
404 DDB behavior, also observed by others<sup>42</sup>, reflects complexes where dynein is in an  
405 inhibited state that binds to microtubules, rather than complexes that are tethered solely  
406 through p150. Second, the longer durations of diffusive segments following p150 block  
407 (**Fig. 6B**) suggests that switching into this state during processive runs reflects dynein  
408 switching into an inhibited state, rather than dynein detaching from the microtubule  
409 while p150 maintains overall microtubule association of the complex. Third, the finding  
410 that the switching rate into and out of the stuck state during processive runs was  
411 unaffected by Ab<sub>p150</sub> (**Fig. 6 C, D**) suggests that this paused state is inherent to the  
412 stepping mechanism of dynein or at least that p150 alone is not sufficient to prevent the  
413 formation of this inhibited state. And last, there was no significant difference between

414 mean velocities of processive segments in control versus p150 block (**Fig. S6**), arguing  
415 that p150 does not act as a brake slowing dynein in the DDB complex, contrary to  
416 previous observations on dynein-dynactin complexes lacking BicD2<sup>25</sup>.

417  
418 Based on recent structural studies, we can make tentative structural assignments to our  
419 identified functional states of dynein. Because the dynein-dynactin-DDB structure is  
420 incompatible with dynein being in the inhibited “phi” state<sup>16</sup>, we interpret our DDB  
421 complexes to reflect dynein in the “open” conformation, with the heads either in an  
422 “open-parallel” configuration optimal for stepping, an “open-inverted” conformation that  
423 can bind to microtubules but not processively step (**Fig. 7A**). Similarly, we hypothesize  
424 that in the DDB structure, p150 is sterically free and able to reversibly interact with  
425 microtubules<sup>43</sup>. This leads to four possible states (**Fig 7A**), with dynein being in either  
426 an open-parallel or open-inverted conformation and p150 either interacting with the  
427 microtubule and constraining the dynactin orientation, or p150 being free and dynactin  
428 being less conformationally constrained. In this model, when p150 interacts with the  
429 microtubule, the open-parallel conformation of dynein is favored, whereas blocking p150  
430 from binding to the microtubule biases the motor toward the open-inverted conformation  
431 (highlighted states in **Fig. 7A**).

432  
433 Instead of predominantly acting as a diffusive tether in the DDB complex, our data  
434 support a model in which p150 is an allosteric activator of dynein. The clearest  
435 evidence for this is the faster switching into the processive state and slower switching  
436 out of the processive state in the control compared to the p150 block (**Fig. 6 C, D** and  
437 **Fig. S7**). Assuming that the action of p150 is through binding to the microtubule rather  
438 than binding to the dynein heads, how could this work? Recent studies investigating the  
439 regulatory protein Lis1 and adapters like BicD2 and Hook3 that can form complexes  
440 containing two dyneins have converged on a model in which a second dynein (or even  
441 the linker and tail of a second dynein) enhances motility by stabilizing the first dynein in  
442 the open-parallel state<sup>16,19,44,45</sup>. Based on this, a possible explanation for p150  
443 enhancement of motility is that when p150 is tethered to the microtubule, it orients the  
444 dynactin filament, and hence the dynein heads, in a conformation that favors the open-  
445 parallel conformation (**Fig. 7A**). Conversely, if p150 does not stabilize dynactin on the  
446 microtubule, the dynactin filament, and the two dynein heads are free to adopt multiple  
447 conformations including the non-motile open-inverted state that either diffuses along or  
448 sticks to microtubules.

449  
450 In contrast to the rapid switching behavior of isolated DDB, kinesin-1 – DDB complexes  
451 displayed long duration events having slow mean velocities and both plus- and minus-  
452 end net directionalities. Work by others has also shown that adapters that more fully  
453 activate dynein generate a greater net minus-end directionality in kinesin-dynein  
454 complexes<sup>12,44</sup>. Because kinesin acts as an effective tether to maintain association with  
455 the microtubule in kinesin-DDB complexes, p150 is not expected to play a tethering role.  
456 However, the significant plus-end velocity shift seen upon p150 inhibition demonstrates  
457 that p150 plays an activating role even when dynein is subjected to plus-end forces  
458 from kinesin-1. Furthermore, the  $+71 \pm 19$  nm/s shift in average speed upon p150  
459 inhibition can be quantitatively explained by the 12% shift of DDB into the diffusive state

460 identified by the switch point detection algorithm (**Fig. 6**). Therefore, p150 can  
461 modulate bidirectional transport in cells by enhancing dynein motility and making it a  
462 stronger opponent to kinesin-1.

463  
464 Whereas kinesins achieve functional diversity through gene duplication, there is only  
465 one dynein heavy chain in the genome; thus regulation of dynein motor properties and  
466 cargo interactions must be achieved through diversity in cargo adapters and exogenous  
467 regulatory proteins<sup>46</sup>. Understanding dynein activation is important because during  
468 bidirectional cargo transport in cells, any regulation of dynein will alter its competition  
469 with kinesin, and hence affect cargo speed and directionality. By applying single-  
470 molecule iSCAT tracking with our novel switch-point detection algorithm, we identify  
471 switches between active and inhibited motor states in DDB and show that p150 affects  
472 the switching rates between these states. Thus, in addition to acting as a diffusional  
473 tether that can enhance dynein run lengths, p150 can enhance dynein stepping both in  
474 isolated DDB complexes and in antagonistic assemblies of DDB and kinesin-1, and as  
475 such should be added to the list of dynein activating proteins.

476  
477

#### 478 **Acknowledgements:**

479 We thank Richard J. McKenney for generously providing the BicD2 plasmid and advice  
480 on DDB purification, Geng-Yuan Chen for assistance with the switch-point detection  
481 algorithm, Keith J. Mickolajczyk for iSCAT microscopy mentoring, and members of the  
482 W.O.H. laboratory for helpful discussions. This work was supported by NIH  
483 R01GM121679 and R01GM122082 to W.O.H.

484  
485 **Author contributions:**

486 Q.F. and W.O.H. designed research; Q.F. performed experiments and wrote the  
487 algorithm; A.M.G. and Q.F. carried out iSCAT experiments and image processing; Q.F.  
488 wrote the paper and Q.F., W.O.H. and A.M.G. edited the paper.

489  
490 **The authors declare no conflict of interest**

491  
492

493 **References:**

- 494
- 495 1. Hirokawa, N., Niwa, S. & Tanaka, Y. Molecular motors in neurons: Transport  
496 mechanisms and roles in brain function, development, and disease. *Neuron* **68**,  
497 610–638 (2010).
  - 498 2. Gross, S. P. *et al.* Interactions and regulation of molecular motors in *Xenopus*  
499 melanophores. *J. Cell Biol.* **156**, 855–865 (2002).
  - 500 3. Hancock, W. O. Bidirectional cargo transport: Moving beyond tug of war. *Nat.*  
501 *Rev. Mol. Cell Biol.* **15**, 615–628 (2014).
  - 502 4. Ligon, L. A., Tokito, M., Finklestein, J. M., Grossman, F. E. & Holzbaaur, E. L. F. A  
503 Direct Interaction between Cytoplasmic Dynein and Kinesin I May Coordinate  
504 Motor Activity. *J. Biol. Chem.* **279**, 19201–19208 (2004).
  - 505 5. Hendricks, A. G. *et al.* Motor Coordination via a Tug-of-War Mechanism Drives  
506 Bidirectional Vesicle Transport. *Curr. Biol.* **20**, 697–702 (2010).
  - 507 6. Müller, M. J. I., Klumpp, S. & Lipowsky, R. Tug-of-war as a cooperative  
508 mechanism for bidirectional cargo transport by molecular motors. (2008).
  - 509 7. Welte, M. A., Gross, S. P., Postner, M., Block, S. M. & Wieschaus, E. F.  
510 Developmental regulation of vesicle transport in *Drosophila* embryos: Forces and  
511 kinetics. *Cell* **92**, 547–557 (1998).
  - 512 8. Goldberg, D. J. Microinjection into an identified axon to study the mechanism of  
513 fast axonal transport. *Proc. Natl. Acad. Sci. USA* **79**, 4818–4822 (1982).
  - 514 9. Martin, M. *et al.* Cytoplasmic Dynein, the Dynactin Complex, and Kinesin Are  
515 Interdependent and Essential for Fast Axonal Transport. *Mol. Biol. Cell* **10**, 3717–  
516 3728 (1999).
  - 517 10. Waterman-Storer, C. M. *et al.* The interaction between cytoplasmic dynein and  
518 dynactin is required for fast axonal transport. *Proc. Natl. Acad. Sci.* **94**, 12180–  
519 12185 (2002).
  - 520 11. Monroy, B. Y. *et al.* Competition between microtubule-associated proteins directs  
521 motor transport. *Nat. Commun.* **9**, 1–12 (2018).
  - 522 12. Belyy, V. *et al.* The mammalian dynein/dynactin complex is a strong opponent to  
523 kinesin in a tug-of-war competition. **18**, 1018–1024 (2017).
  - 524 13. Olenick, M. A. & Holzbaaur, E. L. F. Cell science at a glance dynein activators and  
525 adaptors at a glance. *J. Cell Sci.* **132**, 1–7 (2019).
  - 526 14. Trokter, M., Mucke, N. & Surrey, T. Reconstitution of the human cytoplasmic  
527 dynein complex. *Proc. Natl. Acad. Sci.* **109**, 20895–20900 (2012).
  - 528 15. King, S. J. & Schroer, T. A. Dynactin increases the processivity of the cytoplasmic  
529 dynein motor. *Nat. Cell Biol.* **2**, 20–24 (2000).
  - 530 16. Zhang, K. *et al.* Cryo-EM Reveals How Human Cytoplasmic Dynein Is Article  
531 Cryo-EM Reveals How Human Cytoplasmic Dynein Is Auto-inhibited and  
532 Activated. *Cell* **169**, 1303-1314.e18 (2017).
  - 533 17. Splinter, D. *et al.* BICD2, dynactin, and LIS1 cooperate in regulating dynein  
534 recruitment to cellular structures. *Mol. Biol. Cell* **23**, 4226–4241 (2012).
  - 535 18. Sladewski, T. E. *et al.* Recruitment of Two Dyneins to an mRNA-Dependent  
536 Bicaudal D Transport Complex. **2**, (2018).
  - 537 19. Urnavicius, L. *et al.* Cryo-EM shows how dynactin recruits two dyneins for faster  
538 movement. *Nature* **554**, 202–206 (2018).



- 539 20. McKenney, R. J., Huynh, W., Tanenbaum, M. E., Bhabha, G. & Vale, R. D.  
540 Activation of cytoplasmic dynein motility by dynactin-cargo adapter complexes.  
541 *Science* **345**, 337–341 (2014).
- 542 21. Schlager, M. A., Hoang, H. T., Urnavicius, L., Bullock, S. L. & Carter, A. P. In vitro  
543 reconstitution of a highly processive recombinant human dynein complex. *EMBO*  
544 *J.* **33**, 1855–1868 (2014).
- 545 22. Schroeder, C. M. & Vale, R. D. Assembly and activation of dynein-dynactin by the  
546 cargo adaptor protein Hook3. *J. Cell Biol.* **214**, 309–318 (2016).
- 547 23. Olenick, M. A., Tokito, M., Boczkowska, M., Dominguez, R. & Holzbaur, E. L. F.  
548 Hook adaptors induce unidirectional processive motility by enhancing the Dynein-  
549 Dynactin interaction. *J. Biol. Chem.* **291**, 18239–18251 (2016).
- 550 24. Gutierrez, P. A., Ackermann, B. E., Vershinin, M. & Mckenney, R. J. Differential  
551 effects of the dynein-regulatory factor Lissencephaly-1 on processive dynein-  
552 dynactin motility. *J. Biol. Chem.* **292**, 12245–12255 (2017).
- 553 25. Ayloo, S. *et al.* Dynactin functions as both a dynamic tether and brake during  
554 dynein-driven motility. *Nat. Commun.* **5**, 1–11 (2014).
- 555 26. Grotjahn, D. A. *et al.* Cryo-electron tomography reveals that dynactin recruits a  
556 team of dyneins for processive motility. *Nat. Struct. Mol. Biol.* **25**, 203–207 (2018).
- 557 27. Holzbaur, E. L. F. *et al.* Homology of a 150K cytoplasmic dynein-associated  
558 polypeptide with the Drosophila gene Glued. *Nature* **351**, 579–583 (1991).
- 559 28. Waterman-Storer, C. M., Karki, S. & Holzbaur, E. L. F. The p150(Glued)  
560 component of the dynactin complex binds to both microtubules and the actin-  
561 related protein centractin (Arp-1). *Proc. Natl. Acad. Sci. U. S. A.* **92**, 1634–1638  
562 (1995).
- 563 29. Ross, J. L., Wallace, K., Shuman, H., Goldman, Y. E. & Holzbaur, E. L. F.  
564 Processive bidirectional motion of dynein-dynactin complexes in vitro. *Nat. Cell*  
565 *Biol.* **8**, 562–570 (2006).
- 566 30. Kubala, M. H., Kovtun, O., Alexandrov, K. & Collins, B. M. Structural and  
567 thermodynamic analysis of the GFP:GFP-nanobody complex. *Protein Sci.* **19**,  
568 2389–2401 (2010).
- 569 31. Feng, Q., Mickolajczyk, K. J., Chen, G. Y. & Hancock, W. O. Motor Reattachment  
570 Kinetics Play a Dominant Role in Multimotor-Driven Cargo Transport. *Biophys. J*  
571 **114**, 400–409 (2018).
- 572 32. Mickolajczyk, K. J. *et al.* Kinetics of nucleotide-dependent structural transitions in  
573 the kinesin-1 hydrolysis cycle. *Proc. Natl. Acad. Sci. U. S. A.* **112**, E7186–E7193  
574 (2015).
- 575 33. Ross, J. L., Wallace, K., Shuman, H., Goldman, Y. E. & Holzbaur, E. L. F.  
576 Processive bidirectional motion of dynein – dynactin complexes in vitro. **8**, (2006).
- 577 34. Mickolajczyk, K. J., Geyer, E. A., Kim, T., Rice, L. M. & Hancock, W. O. Direct  
578 observation of individual tubulin dimers binding to growing microtubules. *Proc.*  
579 *Natl. Acad. Sci. U. S. A.* (2019). doi:10.1073/pnas.1815823116
- 580 35. Ruhnnow, F., Zwicker, D. & Diez, S. Tracking single particles and elongated  
581 filaments with nanometer precision. *Biophys. J* **100**, 2820–2828 (2011).
- 582 36. Shastry, S. & Hancock, W. O. Interhead tension determines processivity across  
583 diverse N-terminal kinesins. *Proc. Natl. Acad. Sci. U. S. A.* **108**, 16253–16258  
584 (2011).

- 585 37. McKenney, R. J., Huynh, W., Tanenbaum, M. E., Bhabha, G. & Vale, R. D.  
586 Activation of cytoplasmic dynein motility by dynactin-cargo adapter complexes.  
587 *Science* **345**, (2014).
- 588 38. McKenney, R. J., Huynh, W., Vale, R. D. & Sirajuddin, M. Tyrosination of  $\alpha$ -tubulin  
589 controls the initiation of processive dynein–dynactin motility. *EMBO J.* **35**, 1175–  
590 1185 (2016).
- 591 39. Ortega-Arroyo, J. & Kukura, P. Interferometric scattering microscopy (iSCAT):  
592 New frontiers in ultrafast and ultrasensitive optical microscopy. *Phys. Chem.*  
593 *Chem. Phys.* **14**, 15625–15636 (2012).
- 594 40. Howard, J. *Mechanics of Motor Proteins and the Cytoskeleton*. (2001).
- 595 41. Schnitzer, M. J., Visscher, K. & Block, S. M. Force production by single kinesin  
596 motors. *Nat. Cell Biol.* **2**, 718–723 (2000).
- 597 42. Cianfrocco, M. A., DeSantis, M. E., Leschziner, A. E. & Reck-Peterson, S. L.  
598 Mechanism and Regulation of Cytoplasmic Dynein. *Annu. Rev. Cell Dev. Biol.* **31**,  
599 83–108 (2015).
- 600 43. Urnavicius, L. *et al.* The structure of the dynactin complex and its interaction with  
601 dynein. *Science* **347**, 1441–1446 (2015).
- 602 44. Elshenawy, M. M. *et al.* Lis1 activates dynein motility by pairing it with dynactin.  
603 *bioRxiv* 1–23 (2019). doi:<https://doi.org/10.1101/685826>
- 604 45. Htet, Z. M., Gillies, J. P., Baker, R. W. & Leschziner, A. E. Lis1 promotes the  
605 formation of maximally activated cytoplasmic dynein-1 complexes. *bioRxiv* 1–30  
606 (2019). doi:10.1101/683052
- 607 46. Reck-Peterson, S. L., Redwine, W. B., Vale, R. D. & Carter, A. P. The cytoplasmic  
608 dynein transport machinery and its many cargoes. *Nat. Rev. Mol. Cell Biol.* **19**,  
609 382–398 (2018).
- 610
- 611

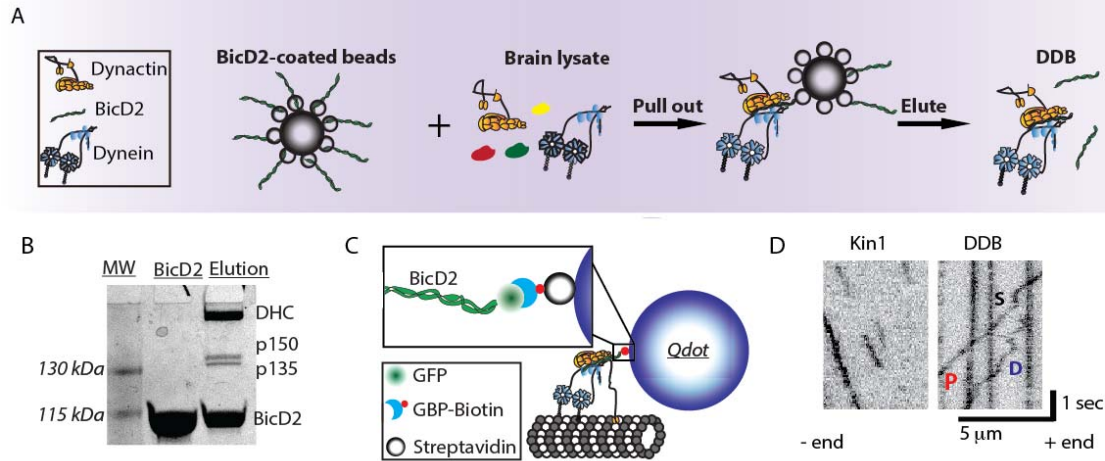

**Figure 1. Purified DDB complex demonstrate processive, diffusive and stuck behaviors**

**(A)** Schematic of DDB purification using BicD2-coated StrepTactin beads to pull dynein/dynactin from brain lysate. DDB was then eluted off of the bead. **(B)** SDS-PAGE gel of recombinant BicD2 and final purified DDB complex showing dominant bands of dynein heavy chain (DHC), dynactin components p150 and p135, and BicD2. **(C)** Tagging DDB for single molecule tracking. Biotinylated GFP binding protein (GBP) is used to link C-terminal GFP on BicD2 to streptavidin-coated quantum dots for TIRF experiments or streptavidin-coated 30-nm gold nanoparticles for iSCAT experiments. **(D)** Kymograph of kinesin-1 (left) and DDB (right) single molecule motility. DDB displays processive runs (P), diffusive episodes (D), and stuck events (S).

612

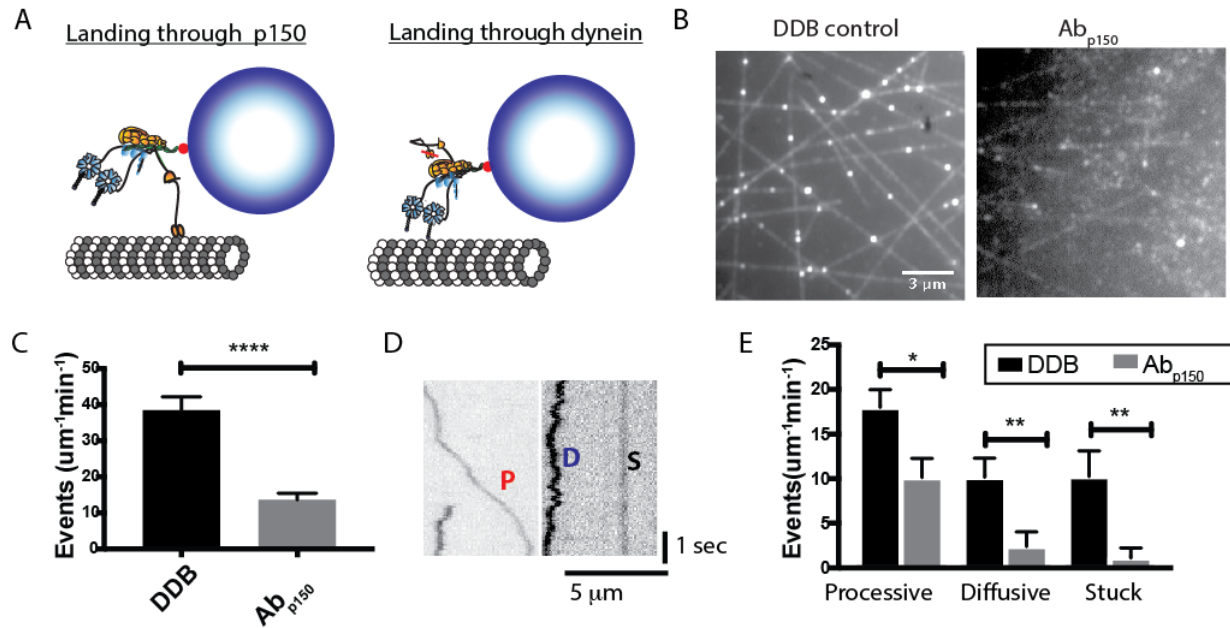

**Figure 2: p150 of dynactin promotes landing of DDB complexes.**

**(A)** Diagram of landing experiment. Initial landing of Qdot-labeled DDB complexes on microtubules can occur either through dynein or through dynactin p150. **(B)** Field of microtubules and attached DDB complexes for control (left) and in the presence of Ab<sub>p150</sub> (right). **(C)** Frequency of landing events in control (black, n = 10 microtubules in 50 s movie length) and Ab<sub>p150</sub> (gray, n = 10 microtubules in 50 s movie length). Error bars are SEM; \*\*\* p<0.001 by t-test. **(D)** Kymographs of DDB landing events, showing processive (P), diffusive (D) and stuck (S) events. **(E)** Frequency of processive, diffusive and stuck landing events for control DDB and DDB in the presence of Ab<sub>p150</sub>. Error bars are SEM; \*p<0.05 and \*\*p<0.01 by t-test.

613

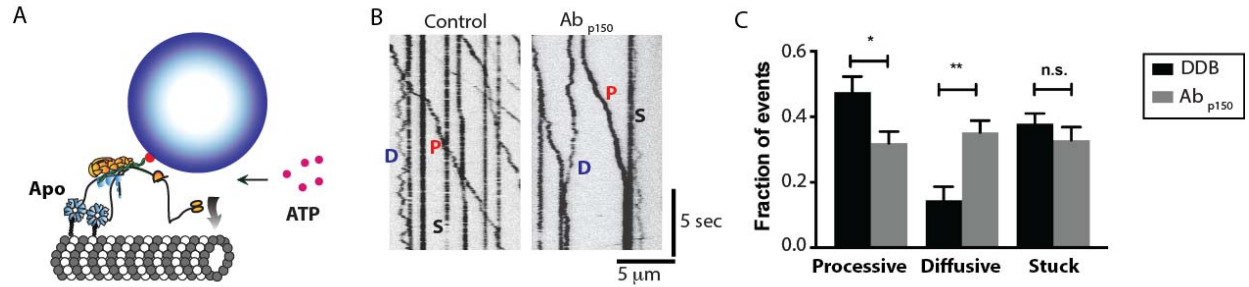

**Figure 3. Blocking p150 dynactin leads to fewer processive events and more diffusive events.**

(A) Diagram of the Apo-lock experiment. DDB complexes bind to immobilized microtubules in absence of ATP, and ATP buffer is flushed into the system to initiate motility. (B) Kymograph of DDB motility 5 min after flowing in ATP buffer for control (left) and in presence of Ab<sub>p150</sub> (right). Processive (P), diffusive (D) and stuck (S) events are noted. (C) Average fraction of processive, diffusive and stuck traces across 10 kymographs for control (black) and Ab<sub>p150</sub> group (gray). Error bars are SEM; \* denotes  $p < 0.05$  (t-test); n.s., not significantly different.

614



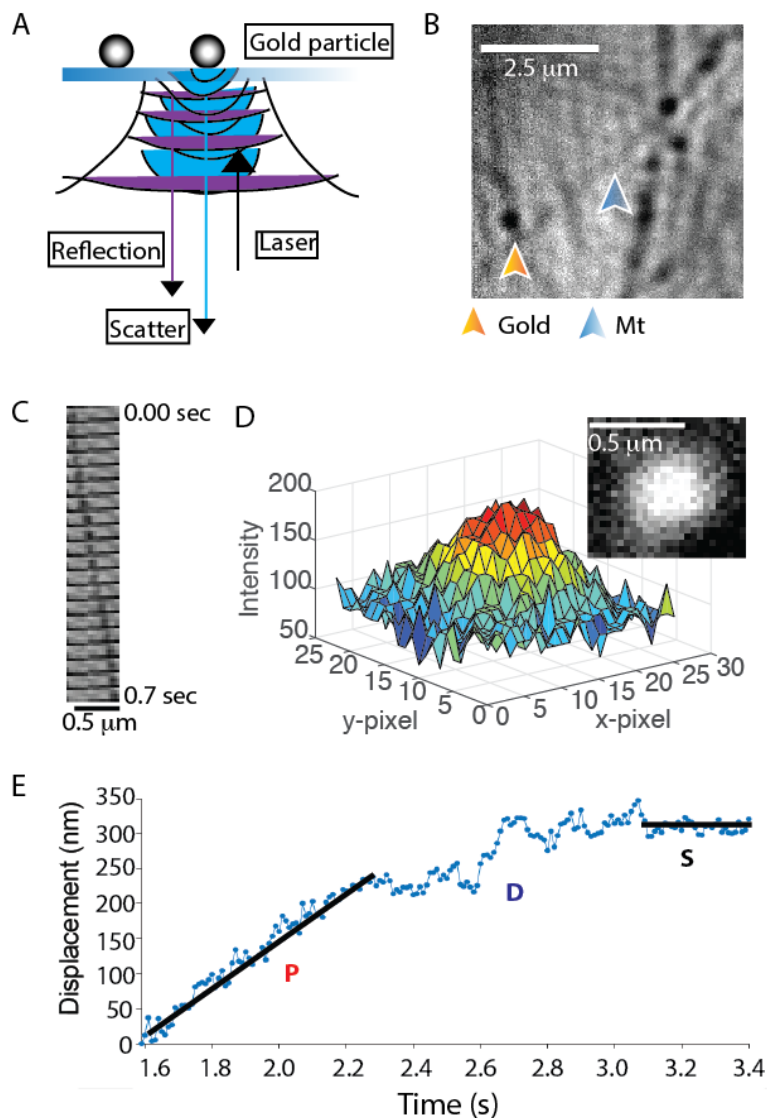

**Figure 4. Single molecule DDB tracking by iSCAT microscopy**

(A) Diagram of iSCAT microscopy. Image is formed by scattered light from the gold nanoparticle (blue) interfering with reflected light from the glass-water interface (purple). (B) iSCAT image of a field of gold nanoparticle-labeled DDB bound to surface-immobilized microtubules. Image shown is generated from a raw image by flat fielding, which corrects inhomogeneous illumination across the field. (C) Montage of a gold particle-labeled DDB moving along an immobilized microtubule; each image is 35 msec apart. (D) Plot of pixel intensity of a gold nanoparticle (image in inset), which is fit by a 2-D Gaussian for sub-pixel localization. Image is generated by subtracting image of the stationary microtubule (taken later in the movie when no gold-labeled motor is present) and inverting image to obtain bright particle on dark background. See also **Supplementary Movie S1**. (E) Distance vs time trace of a single DDB, demonstrating processive (P), diffusive (D), and stuck (S) episodes in the same trace. Lines represent linear regressions to hand-selected segments.

615

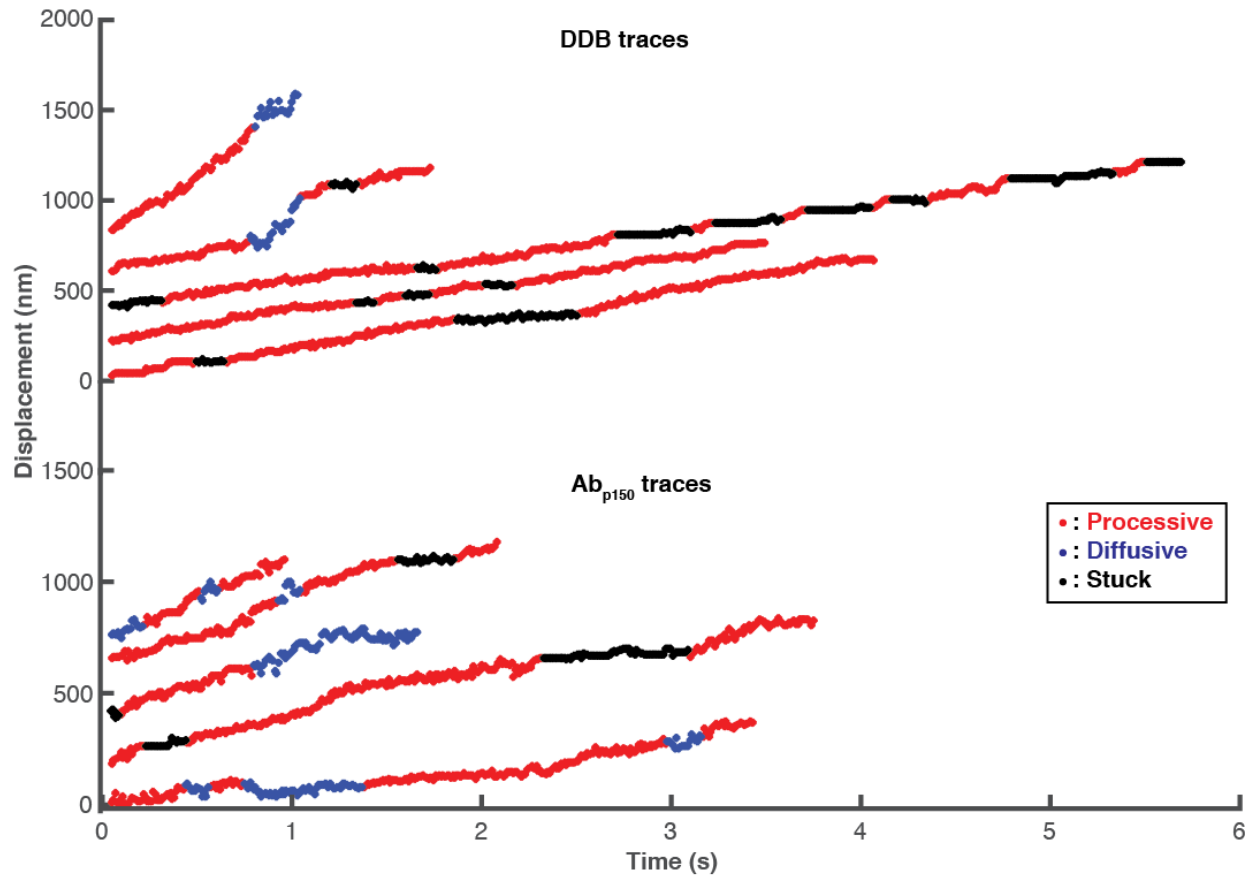

**Figure 5. High-resolution DDB tracking and motility state identification.**

Sample traces of control DDB (top) and DDB in presence of  $Ab_{p150}$  (bottom) taken at 100 frames/s by iSCAT microscopy and processed with the state switching algorithm. Processive segments are labeled in red, diffusive episodes in blue, and stuck durations in black.

616

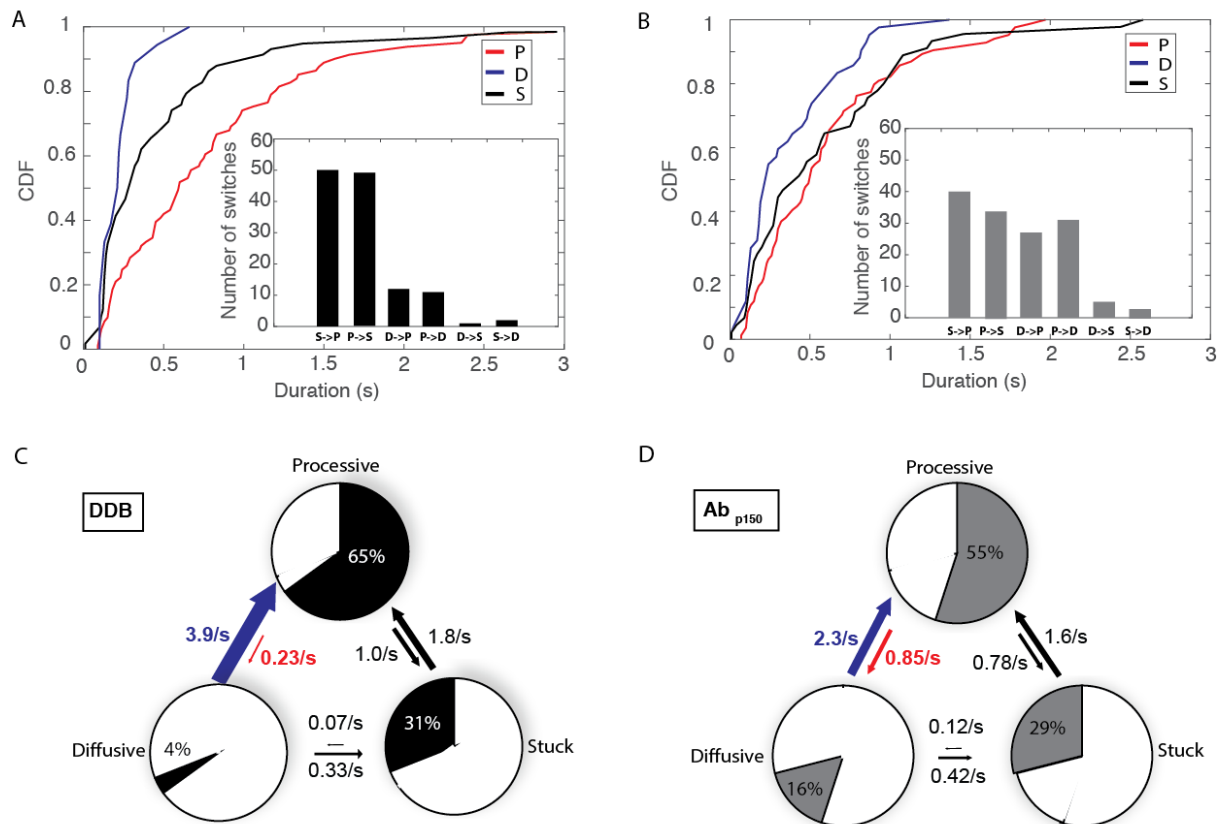

**Figure 6. p150 shortens diffusive segments and elongates processive segments.**

**(A)** Cumulative distributions of processive, diffusive and stuck segment durations for control DDB. Mean durations were 0.81 s for processive, 0.23 s for diffusive, and 0.53 s for stuck states. Inset: Number of detected state switches over 93 s total analyzed time from 31 molecules. **(B)** Cumulative distributions of processive, diffusive and stuck segment durations for DDB in the presence of Ab<sub>p150</sub>. Mean durations were 0.61 s for processive, 0.37 s for diffusive, and 0.60 s for stuck states. Inset: Number of detected state switches for Ab<sub>p150</sub> group over 100 s total analyzed time from 32 molecules. **(C)** State switching diagram showing first-order switching rates between states and fraction of time spent in each state for control DDB. Blue-colored arrow denotes the most significant decrease in switching rate with Ab<sub>p150</sub>, while red arrow denotes the most significant increase in switching rate. **(D)** State switching diagram showing first-order switching rates between states and fraction of time spent in each state DDB in the presence of Ab<sub>p150</sub>.

617

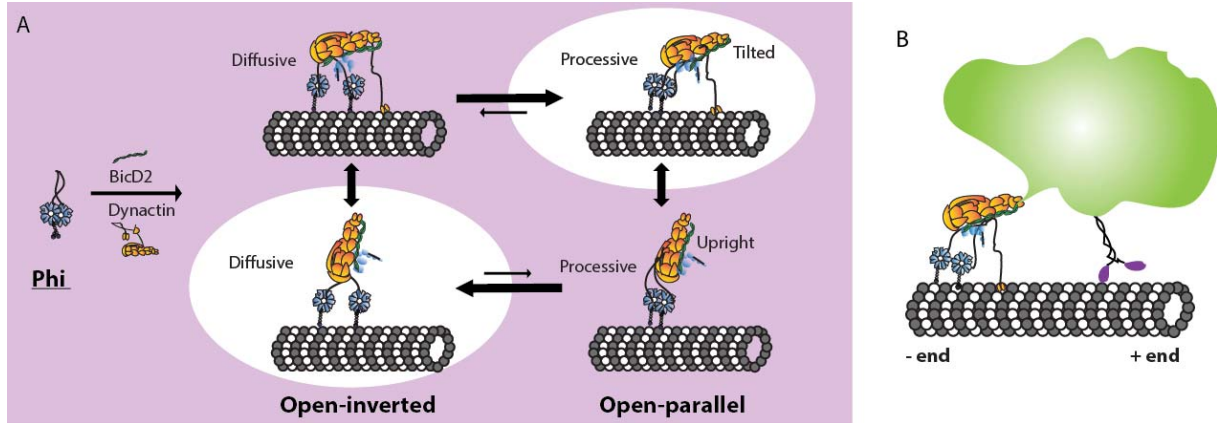

**Figure 7. Proposed model for DDB motility enhancement by p150 dynactin.**

**(A)** Dynein can reside in the inactive phi conformation in solution, but forming a DDB complex results in dynein switching to an open conformation. In the open-inverted conformation, DDB is more likely to diffuse along microtubules, while in the open-parallel conformation DDB is more processive. **(Top)** p150 interaction with the microtubule promotes a tilted dynactin geometry that stabilizes the open-parallel conformation of dynein and results in enhanced processivity. **(Bottom)** Blocking p150 causes dynactin to adopt a more flexible upright geometry that promotes the open-inverted conformation of dynein and results in DDB diffusing on the microtubule. **(B)** Implications for bidirectional cargo transport in cells: enhancement of DDB processivity by p150 promotes net minus-end cargo transport.

618

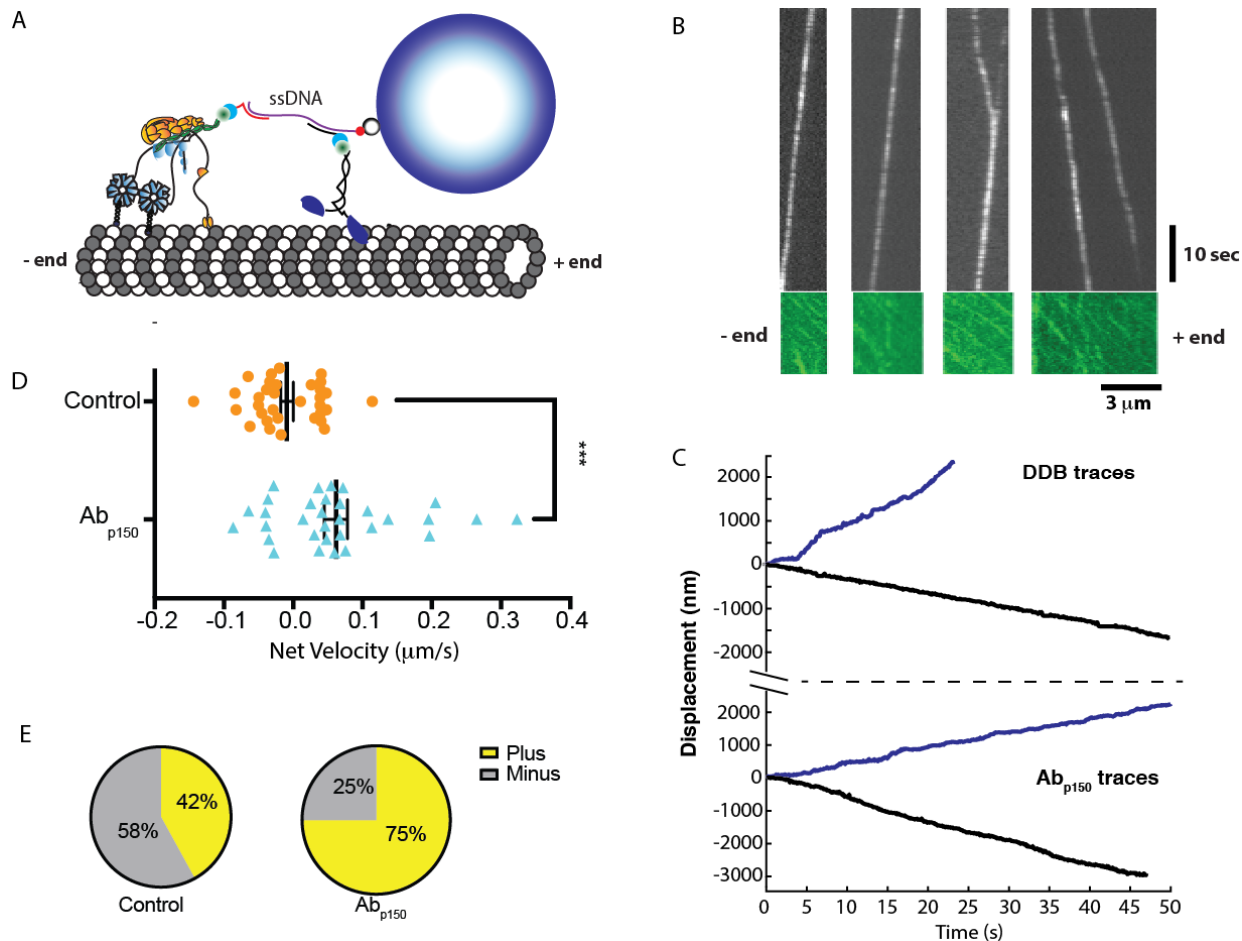

**Figure 8: p150 activates DDB in kinesin-DDB bidirectional transport.**

(A) Diagram of the reconstituted bidirectional transport system. Single kinesin-1 and DDB are connected through ssDNA-functionalized GBP1 and GBP2 adapters to a dsDNA scaffold, linked at its biotinylated 5' end to a streptavidin-coated Qdot. (B) Kymographs Qdot-labeled DDB-kinesin-1 (top) in the 647 nm channel, and the excess kinesin-1 motors streaming to the plus end in the GFP channel (bottom), used to identify the polarity of the microtubule. See also **Supplemental Movie S2**. (C) Sample traces of DDB-kinesin-1 for control (top) and  $\text{Ab}_{p150}$  group (bottom). (D) Velocities of the control group (orange;  $-9.1 \pm 9.2$  nm/s (mean  $\pm$  SEM,  $n=33$ )) and the  $\text{Ab}_{p150}$  group (blue;  $62 \pm 17$  nm/s (mean  $\pm$  SEM,  $n=32$ )) calculated by from linear regression to entire traces. The two groups were significantly different by two-tailed t-test, \*\*\* $p < 0.0005$ . (E) Percent of plus-end directed cargos (yellow) and minus end directed cargos (grey) for control DDB-kinesin-1 group (left) and  $\text{Ab}_{p150}$  group (right).

619
